# Supplementary material for: External Validation of a Mammography-Derived AI-Based Risk Model in a U.S. Breast Cancer Screening Cohort of White and Black Women
Source: MDPI journal article supplement (doi:10.3390/cancers14194803), 2022-09-30
Supplement: s1 [file s1]

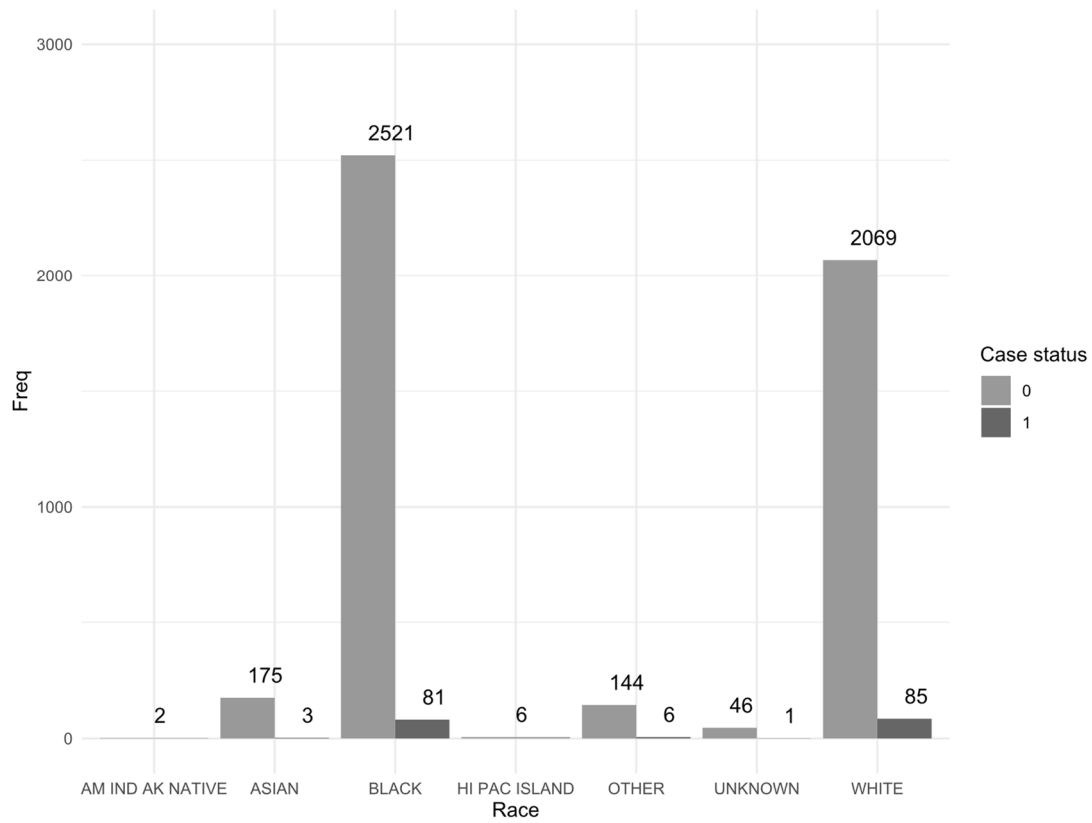

**Supplementary Figure S1.** Racial distribution of breast cancer cases and controls in study dataset.

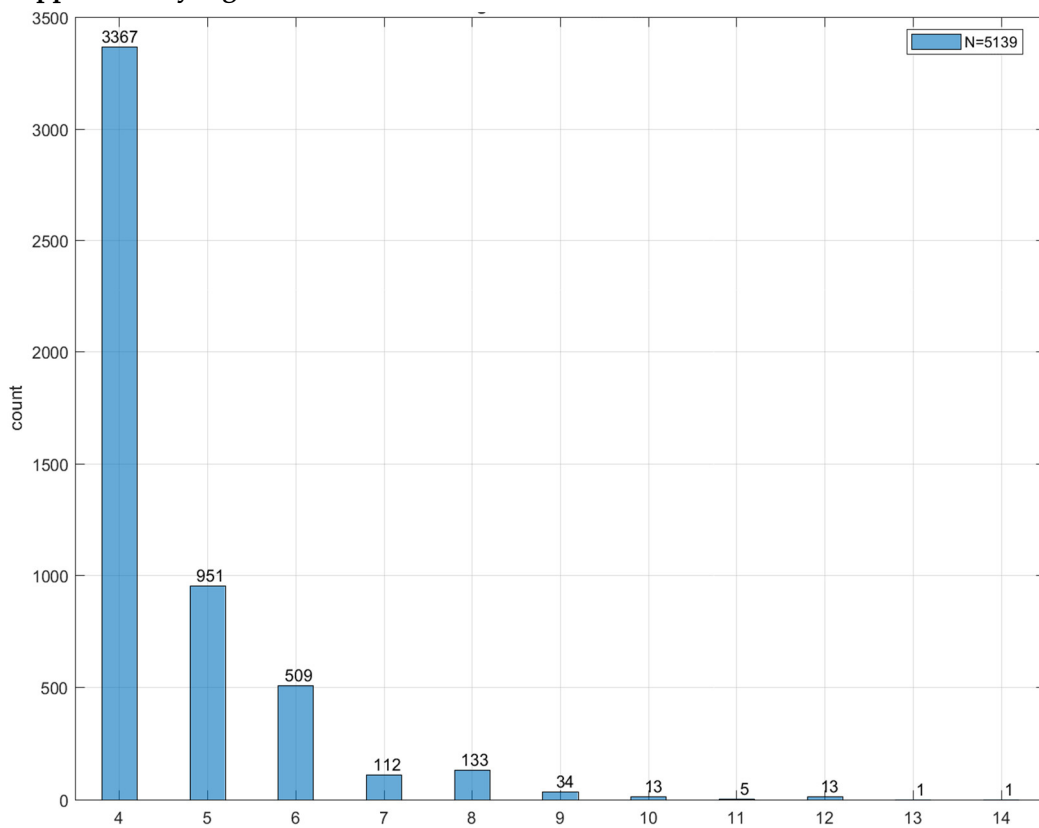

**Supplementary Figure S2.** Histogram of number of FFDM images per mammographic exam.

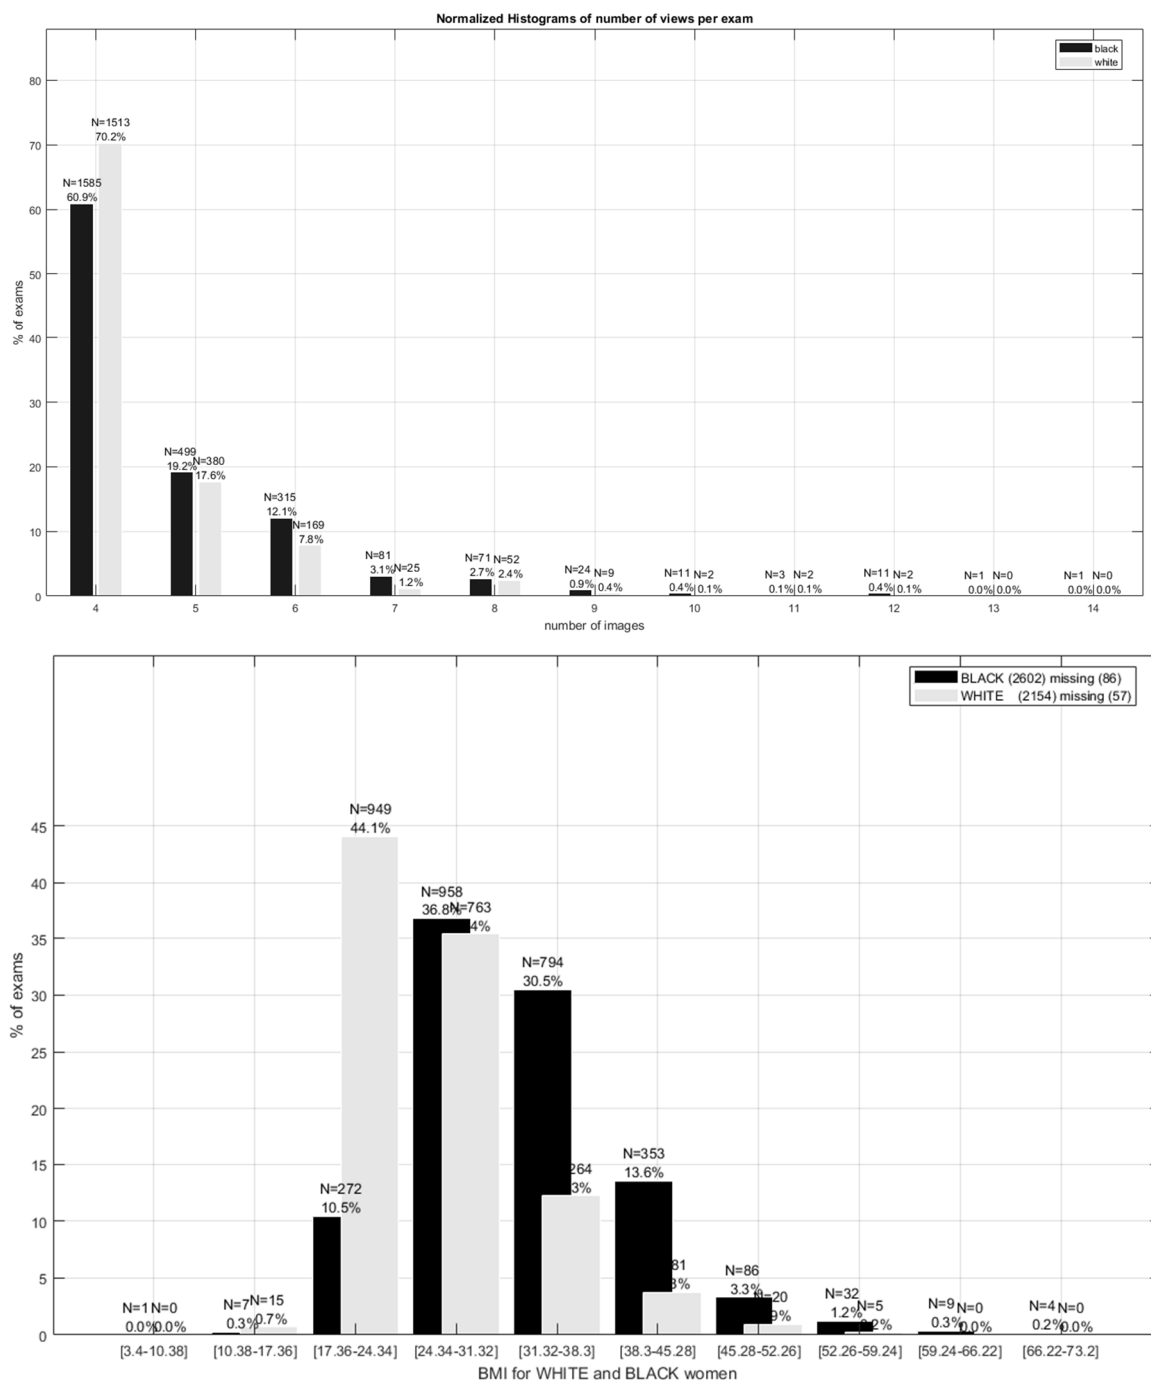

**Supplementary Figure S3.** Histograms of (top row) number of FFDM images per mammographic exam and (bottom row) BMI, for White and Black women.
