# Supplementary material for: External Validation of a Mammography-Derived AI-Based Risk Model in a U.S. Breast Cancer Screening Cohort of White and Black Women
Source: MDPI journal article supplement (doi:10.3390/cancers14194803), 2022-09-30
Supplement: s1 [file s1]

**Supplementary Table S1.** Baseline characteristics in relation to racial subgroups.

| Risk factor                     | Controls (N=4,963)            |                               |                             | Cases (N=176)              |                            |                           |
|---------------------------------|-------------------------------|-------------------------------|-----------------------------|----------------------------|----------------------------|---------------------------|
|                                 | White, N = 2,069 <sup>1</sup> | Black, N = 2,521 <sup>1</sup> | Other, N = 327 <sup>1</sup> | White, N = 85 <sup>1</sup> | Black, N = 81 <sup>1</sup> | Other, N = 9 <sup>1</sup> |
| Age at screening                | 57.09 (10.36)                 | 56.29 (10.22)                 | 54.46 (10.34)               | 59.58 (11.34)              | 61.13 (11.05)              | 63.72 (8.24)              |
| BMI at screening                | 26.35 (6.06)                  | 32.51 (7.47)                  | 25.03 (4.81)                | 26.53 (6.02)               | 32.72 (6.30)               | 24.91 (3.48)              |
| Missing BMI                     | 53                            | 81                            | 28                          | 4                          | 5                          | 1                         |
| Age >50 (postmenopausal)        | 1,500 / 2,069 (72%)           | 1,734 / 2,521 (69%)           | 198 / 327 (61%)             | 65 / 85 (76%)              | 65 / 81 (80%)              | 9 / 9 (100%)              |
| Age at first child              |                               |                               |                             |                            |                            |                           |
| Nulliparous                     | 595 / 1,886 (32%)             | 430 / 2,097 (21%)             | 65 / 277 (23%)              | 17 / 72 (24%)              | 13 / 61 (21%)              | 2 / 8 (25%)               |
| < 20                            | 73 / 1,886 (3.9%)             | 729 / 2,097 (35%)             | 20 / 277 (7.2%)             | 2 / 72 (2.8%)              | 21 / 61 (34%)              | 1 / 8 (12%)               |
| 20-24                           | 287 / 1,886 (15%)             | 519 / 2,097 (25%)             | 42 / 277 (15%)              | 14 / 72 (19%)              | 12 / 61 (20%)              | 3 / 8 (38%)               |
| 25-29                           | 477 / 1,886 (25%)             | 252 / 2,097 (12%)             | 76 / 277 (27%)              | 17 / 72 (24%)              | 9 / 61 (15%)               | 1 / 8 (12%)               |
| >= 30                           | 454 / 1,886 (24%)             | 167 / 2,097 (8.0%)            | 74 / 277 (27%)              | 22 / 72 (31%)              | 6 / 61 (9.8%)              | 1 / 8 (12%)               |
| Missing                         | 183                           | 424                           | 50                          | 13                         | 20                         | 1                         |
| Family history of breast cancer |                               |                               |                             |                            |                            |                           |
| No family history               | 1,609 / 2,048 (79%)           | 2,075 / 2,484 (84%)           | 265 / 322 (82%)             | 50 / 82 (61%)              | 58 / 75 (77%)              | 6 / 9 (67%)               |
| One 1st degree relative         | 392 / 2,048 (19%)             | 379 / 2,484 (15%)             | 53 / 322 (16%)              | 24 / 82 (29%)              | 12 / 75 (16%)              | 3 / 9 (33%)               |
| ≥2 1st degree relatives         | 47 / 2,048 (2.3%)             | 30 / 2,484 (1.2%)             | 4 / 322 (1.2%)              | 8 / 82 (9.8%)              | 5 / 75 (6.7%)              | 0 / 9 (0%)                |
| Missing                         | 21                            | 37                            | 5                           | 3                          | 6                          | 0                         |
| Number of prior biopsies        |                               |                               |                             |                            |                            |                           |
| 0                               | 195 / 610 (32%)               | 221 / 549 (40%)               | 18 / 56 (32%)               | 2 / 27 (7.4%)              | 2 / 16 (12%)               | 0 / 3 (0%)                |
| 1                               | 269 / 610 (44%)               | 242 / 549 (44%)               | 26 / 56 (46%)               | 12 / 27 (44%)              | 9 / 16 (56%)               | 3 / 3 (100%)              |
| 2 or more                       | 146 / 610 (24%)               | 86 / 549 (16%)                | 12 / 56 (21%)               | 13 / 27 (48%)              | 5 / 16 (31%)               | 0 / 3 (0%)                |
| Missing                         | 1,459                         | 1,972                         | 271                         | 58                         | 65                         | 6                         |
| Atypical hyperplasia            | 25 / 210 (12%)                | 3 / 119 (2.5%)                | 2 / 18 (11%)                | 3 / 11 (27%)               | 0 / 5 (0%)                 | 0 / 1 (0%)                |
| Missing                         | 1,859                         | 2,402                         | 309                         | 74                         | 76                         | 8                         |
| BI-RADS density                 |                               |                               |                             |                            |                            |                           |
| 1                               | 148 / 2,069 (7.2%)            | 455 / 2,521 (18%)             | 15 / 327 (4.6%)             | 4 / 85 (4.7%)              | 8 / 81 (9.9%)              | 1 / 9 (11%)               |
| 2                               | 1,128 / 2,069 (55%)           | 1,520 / 2,521 (60%)           | 144 / 327 (44%)             | 39 / 85 (46%)              | 40 / 81 (49%)              | 4 / 9 (44%)               |
| 3                               | 733 / 2,069 (35%)             | 519 / 2,521 (21%)             | 156 / 327 (48%)             | 41 / 85 (48%)              | 32 / 81 (40%)              | 4 / 9 (44%)               |
| 4                               | 60 / 2,069 (2.9%)             | 27 / 2,521 (1.1%)             | 12 / 327 (3.7%)             | 1 / 85 (1.2%)              | 1 / 81 (1.2%)              | 0 / 9 (0%)                |

<sup>1</sup> Mean (SD); n / N (%);

---

N=46 controls and N=1 breast cancer case have missing information on race.

2  
3  
4

**Supplementary Table S2.** Detection and tumor characteristics at follow-up for all breast cancer cases, and in relation to racial subgroups.

| Characteristic                               | All, N = 176 <sup>1</sup> | White, N = 85 <sup>1</sup> | Black, N = 81 <sup>1</sup> | Other, N = 9 <sup>1</sup> |
|----------------------------------------------|---------------------------|----------------------------|----------------------------|---------------------------|
| Screening to diagnosis (days) <sup>2</sup> , |                           |                            |                            |                           |
| p1                                           | 107                       | 115                        | 107                        | 152                       |
| p25                                          | 382                       | 388                        | 378                        | 414                       |
| p50 (median)                                 | 423                       | 440                        | 409                        | 486                       |
| p75                                          | 590                       | 654                        | 498                        | 581                       |
| p99                                          | 762                       | 751                        | 763                        | 678                       |
| Detection classification                     |                           |                            |                            |                           |
| False negative-MR detected                   | 7 / 173 (4.0%)            | 6 / 84 (7.1%)              | 0 / 79 (0%)                | 1 / 9 (11%)               |
| False negative-PET detected                  | 1 / 173 (0.6%)            | 1 / 84 (1.2%)              | 0 / 79 (0%)                | 0 / 9 (0%)                |
| False negative-symptomatic                   | 19 / 173 (11%)            | 9 / 84 (11%)               | 9 / 79 (11%)               | 1 / 9 (11%)               |
| False negative cat3                          | 2 / 173 (1.2%)            | 0 / 84 (0%)                | 2 / 79 (2.5%)              | 0 / 9 (0%)                |
| True positive                                | 144 / 173 (83%)           | 68 / 84 (81%)              | 68 / 79 (86%)              | 7 / 9 (78%)               |
| Missing                                      | 3                         | 1                          | 2                          | 0                         |
| Invasiveness                                 |                           |                            |                            |                           |
| In-situ                                      | 48 / 176 (27%)            | 26 / 85 (31%)              | 19 / 81 (23%)              | 3 / 9 (33%)               |
| Invasive                                     | 128 / 176 (73%)           | 59 / 85 (69%)              | 62 / 81 (77%)              | 6 / 9 (67%)               |
| Tumor size, invasive (mm)                    |                           |                            |                            |                           |
| <=10mm                                       | 108 / 176 (61%)           | 60 / 85 (71%)              | 39 / 81 (48%)              | 9 / 9 (100%)              |
| >10 – 20 mm                                  | 43 / 176 (24%)            | 18 / 85 (21%)              | 24 / 81 (30%)              | 0 / 9 (0%)                |
| >20 mm                                       | 25 / 176 (14%)            | 7 / 85 (8.2%)              | 18 / 81 (22%)              | 0 / 9 (0%)                |
| In-situ grade                                |                           |                            |                            |                           |
| Low-intermediate                             | 35 / 49 (71%)             | 18 / 26 (69%)              | 15 / 20 (75%)              | 2 / 3 (67%)               |
| High                                         | 14 / 49 (29%)             | 8 / 26 (31%)               | 5 / 20 (25%)               | 1 / 3 (33%)               |
| Affected lymph nodes                         |                           |                            |                            |                           |
| Missing                                      | 41                        | 23                         | 15                         | 3                         |
| Stage                                        |                           |                            |                            |                           |
| 1a                                           | 88 / 175 (50%)            | 45 / 85 (53%)              | 36 / 80 (45%)              | 6 / 9 (67%)               |
| 1b                                           | 1 / 175 (0.6%)            | 1 / 85 (1.2%)              | 0 / 80 (0%)                | 0 / 9 (0%)                |
| 2a                                           | 19 / 175 (11%)            | 7 / 85 (8.2%)              | 12 / 80 (15%)              | 0 / 9 (0%)                |
| 2b                                           | 8 / 175 (4.6%)            | 0 / 85 (0%)                | 8 / 80 (10%)               | 0 / 9 (0%)                |
| 3a                                           | 3 / 175 (1.7%)            | 2 / 85 (2.4%)              | 1 / 80 (1.2%)              | 0 / 9 (0%)                |
| 3b                                           | 2 / 175 (1.1%)            | 1 / 85 (1.2%)              | 1 / 80 (1.2%)              | 0 / 9 (0%)                |
| 3c                                           | 2 / 175 (1.1%)            | 0 / 85 (0%)                | 2 / 80 (2.5%)              | 0 / 9 (0%)                |
| 4                                            | 4 / 175 (2.3%)            | 3 / 85 (3.5%)              | 1 / 80 (1.2%)              | 0 / 9 (0%)                |
| DCIS                                         | 48 / 175 (27%)            | 26 / 85 (31%)              | 19 / 80 (24%)              | 3 / 9 (33%)               |
| Missing                                      | 1                         | 0                          | 1                          | 0                         |
| Advanced cancer                              |                           |                            |                            |                           |
| ER-positive                                  | 137 / 173 (79%)           | 70 / 83 (84%)              | 59 / 80 (74%)              | 7 / 9 (78%)               |
| Missing                                      | 3                         | 2                          | 1                          | 0                         |
| HER2-positive                                |                           |                            |                            |                           |
|                                              | 20 / 146 (14%)            | 13 / 68 (19%)              | 6 / 69 (8.7%)              | 0 / 8 (0%)                |

|         |    |    |    |   |
|---------|----|----|----|---|
| Missing | 30 | 17 | 12 | 1 |
|---------|----|----|----|---|

<sup>1</sup> Mean (SD); n / N (%); N=1 woman has missing information on race.

Advanced cancers were defined as cancers of AJCC Pathological Prognostic Stage of 2A or greater.

<sup>2</sup> Percentiles of distribution of days from date of screening to date of diagnosis.

**Supplementary Table S3.** AI risk scores in study dataset: Distributions by case-control status in relation to racial subgroups.

| Risk factor                                 | Controls (N=4,963)              |                                 |                               | Cases (N=176)                |                              |                             |
|---------------------------------------------|---------------------------------|---------------------------------|-------------------------------|------------------------------|------------------------------|-----------------------------|
|                                             | White<br>N = 2,069 <sup>1</sup> | Black<br>N = 2,521 <sup>1</sup> | Other<br>N = 327 <sup>1</sup> | White<br>N = 85 <sup>1</sup> | Black<br>N = 81 <sup>1</sup> | Other<br>N = 9 <sup>1</sup> |
| Breast percent density <sup>2</sup>         | 30.15<br>(21.37)                | 21.58<br>(18.66)                | 31.96<br>(20.03)              | 33.96<br>(23.18)             | 30.53<br>(21.48)             | 20.94<br>(15.02)            |
| Calcs malignancy                            | 0.12 (0.14)                     | 0.14 (0.17)                     | 0.11 (0.14)                   | 0.20 (0.20)                  | 0.25 (0.23)                  | 0.21 (0.26)                 |
| Masses malignancy                           | 0.18 (0.19)                     | 0.18 (0.20)                     | 0.16 (0.18)                   | 0.24 (0.24)                  | 0.24 (0.24)                  | 0.20 (0.23)                 |
| Calcs asymmetry                             | 0.03 (0.04)                     | 0.04 (0.06)                     | 0.02 (0.04)                   | 0.05 (0.07)                  | 0.08 (0.09)                  | 0.07 (0.11)                 |
| Masses asymmetry                            | 0.05 (0.06)                     | 0.05 (0.06)                     | 0.04 (0.05)                   | 0.08 (0.09)                  | 0.07 (0.08)                  | 0.05 (0.04)                 |
| AI 2-year risk, %<br>(Q1,Q3)                | 0.79<br>(0.50,1.33)             | 0.80<br>(0.50,1.40)             | 0.62<br>(0.42,1.06)           | 1.19<br>(0.77,2.51)          | 1.53<br>(0.83,3.65)          | 1.18<br>(0.63,1.78)         |
| Gail 5-year risk, %<br>(Q1,Q3) <sup>3</sup> | 1.61<br>(1.16,2.12)             | 1.30<br>(0.99,1.62)             | 0.85<br>(0.56,1.41)           | 1.82<br>(1.39,2.96)          | 1.36<br>(1.08,1.72)          | 1.55<br>(0.91,2.13)         |

Mean (SD); n / N (%); Median (Q1,Q3).

<sup>1</sup> N=46 controls and N=1 breast cancer case have missing information on race.

<sup>2</sup> For one breast in a control exam the percent density was not obtained, and the unilateral density result was used for the risk analysis.

<sup>3</sup> Gail risk was available on 166 cases and 4,894 controls.

**Supplementary Table S4.** Discriminatory performance (AUC) of AI risk model at two acquisition time-points. (1<sup>st</sup> acquisition timepoint) using the images acquired first for each FFDM view of the mammographic exam and (last acquisition timepoint) using the images acquired last for each FFDM view of the mammographic exam, in all women with >4 FFDM views and in racial subgroups.

| Risk model                 | All women<br>(66/1,706) |             | White women<br>(31/610) |             | Black women<br>(34/983) |             | p-value <sup>2</sup> |
|----------------------------|-------------------------|-------------|-------------------------|-------------|-------------------------|-------------|----------------------|
|                            | AUC                     | 95% CI      | AUC                     | 95% CI      | AUC                     | 95% CI      |                      |
| 1st acquisition timepoint  | 0.69                    | 0.62 - 0.75 | 0.65                    | 0.55 - 0.75 | 0.71                    | 0.62 - 0.79 | 0.37                 |
| Last acquisition timepoint | 0.71                    | 0.64 - 0.77 | 0.68                    | 0.58 - 0.77 | 0.72                    | 0.64 - 0.79 | 0.40                 |
| p-value <sup>3</sup>       | 0.71                    |             | 0.78                    |             | 0.83                    |             |                      |

Only women with >4 FFDM views are included.

Unadjusted AUCs. Confidence intervals estimated using bootstrapping. Permutation test tested for difference between AUCs in White and Black women for each model (p-value<sup>2</sup>) and between 1<sup>st</sup> and last acquisition timepoint of the same mammographic exam (p-value<sup>3</sup>).
